# Supplementary material for: Kiaa1024L/Minar2 is essential for hearing by regulating cholesterol distribution in hair bundles
Source: eLife. 2022 Nov 1;11:e80865. doi: 10.7554/eLife.80865 (PMC9714970; doi:10.7554/eLife.80865)
Supplement: Figure 1—source data 1. [file elife-80865-fig1-data1.xlsx]

## Sheet: Figure 1B
wild type C-start response rate %	minar2fs139 C-start response rate %
80	60
80	30
60	90
70	20
80	50
70	50
80	60
90	40
10	80
90	60
90	50
50	60
80	90
90	40
90	60
80	40
90	60
90	70
80	40
60	40
90	60
70	70
60	90
80	60
80	60
90	50
70	40
80	60
80	70
30	70
10	80
90	80
40	50
60	70
80	30
90	50
80	70
70	80
70	20
70	50
60	100
50	20
80	40
60	70
100	60
90	80
70	80
60	60
80	70
60	60
40	70
50	60
100	70
70	80
70	40
80	10
90	50
40	70
50	20
50	70
100	60
50	80
80	30
	10

## Sheet: Figure 1C
Frequency (Hz)	wild type -Threshold (dB re 1 μPa)													minar2fs139-Threshold (dB re 1 μPa)
100	141.6	150	153.9	146.1	141.6	146.1	141.5	147.5	141.5	141.5	151.5			150	146.1	154.7	146.1	153.9	154.7	150	146.1	160.5	147.5	151.5	154.5	147.5
200	137.7	152.6	154.8	146.6	146.6	146.6	141.5	141.5	137.5	137.5	154.5			152.6	146.6	154.8	152.6	154.8	154.8	152.6	154.8	154.5	141.5	154.5	154.5	149.5
400	135.6	139	143.5	139	135.6	135.6	135.5	141.5	135.5	135.5	148			143.5	139	147.8	143.5	147.8	143.5	143.5	139	153.5	141.5	141.5	141.5	141.5
600	133.2	137.1	137.1	137.1	133.2	133.2	133.5	133.5	133.5	133.5	133.5			133.2	133.2	140.5	137.1	137.1	137.1	140.5	133.2	133.5	133.5	133.5	133.5	133.5
800	147.2	152.8	150.1	150.1	143.8	143.8	145.5	150.5	145.5	150.5	154.5			150.1	150.1	154.4	150.1	152.8	147.2	147.2	147.2	160.5	150.5	150.5	154.5	145.5
1000	147.9	150.7	150.7	147.9	147.9	144.5	151.5	151.5	151.5	151.5	151.5			150.7	147.9	150.7	150.7	147.9	147.9	147.9	147.9	155.5	144.5	151.5	151.5	144.5

## Sheet: Figure 1D
5dpf--wild type AM1-43 Intesnity	5dpf--minar2fs139 AM1-43 Intesnity
108.922	64.9791
91.9694	48.625
111.65	102.459
101.018	28.9315
48.5217	69.4462
83.183	92.2753
125.409	33.542
119.381	57.0823
88.5127	42.2926
121.433	86.5605
119.976	108.491
100.674	33.6195
91.0813	50.391
120.873	98.7622
105.489	38.4254
128.732	90.5806
70.1162	104.725
105.433	63.9259
116.234	44.3618
41.3911	87.2331
108.17	51.345
91.2979	101.47
120.537	37.8279
84.4408	12.0305
122.328	24.2689
87.5633	37.6302
113.797	22.5036
99.597	73.284
91.5051	43.3249
72.4178	18.0604
115.796	66.519
94.2263	48.7413
119.369	31.2397
92.6775	25.7277
86.2777	48.0216
	55.5508

## Sheet: Figure 1E
5dpf--wild type Hair cells/Neuromast	5dpf--minar2fs139 Hair cells/Neuromast
10	4
14	3
12	11
6	13
9	4
8	8
10	8
10	8
5	9
9	10
12	9
11	12
7	5
10	7
13	7
8	4
15	12
10	7
7	7
16	8
15	8
14	13
10	6
11	6
12	14
11	9
7	10
8	11
11	10
11	11
	10
	10

## Sheet: Figure 1F
Utricle	WT																minar2fs139
Area1		54	44	38	65	58	64	73	63	38	50	47	70	42	68		54	45	42	40	45	38	46	44	42	38	43	30	44	48	50	48	40	46	49
Area2	73	56	69	70	78	68	68	70	66	59	76	67	74	67			42	74	63	55	44	28	53	61	43	36	73	50	60	52	53
Area3	64	70	74	82	80	58	81	51	62	80	74	72	66	64	65		66	61	59	46	63	50	51	64	49	55	72	58	59	71	61	53
Saccule	WT																minar2fs139
Area1	77	82	101	64	75	119	71	78	64	61	58	86					74	58	63	51	50	59	50	80	72
Area2	61	60	62	83	56	55	74	82	58	46	69	52					43	56	45	41	38	47	42	43	50
Area3	64	69	64	52	53	92	83	79	55	56	88	64					50	72	61	56	41	59	34	50	50

## Sheet: Figure 1-figure supplement 1B
Mouse--Expression level	Minar2						Myo6						Tmc1
IHC	102.262	100.616	99.9908	102.308			103.571	103.55	102.52	102.365			71.549	72.4843	73.1245	74.6055
OHC	68.9938	69.4014	66.9696	70.3108	73.5262	72.9347	98.7371	98.3239	101.293	99.5507	102.815	103.49	133.602	134.532	141.429	138.867	138.026	142.096
Deiters	16.2499	16.1278	17.8828	17.4506	16.7025	16.5059	109.008	107.619	107.019	106.842	112.355	112.501	0.73561	1.01573	0.91964	1.04247	0.92463	0.84049
Pillars	26.7697	26.9373	26.6081	27.3855	26.2536	26.5756	33.3676	33.1957	34.303	34.0306	34.0477	33.6662	17.8276	19.3309	19.6072	19.492	19.6837	20.1169
RBC	0.48202	3.09823	4.27664				2.44668	5.39994	3.72388				0	0	0
Liver	0	0	0	0			1.16847	0.80131	2.39502	3.09797			0	0	0	0
Zebrafish--Expression level in HC	minar2		myo6b		tmc1
3dpf	2.91841		1.36028		0.36587
5dpf	2.09592		2.77		3.17
11-13mpf	8.25992		7.58537		6.15903
Human--Expression level	MINAR2	MYO15A	MYO7A	TMIE	TMC1	PCDH15	CDH23
Epidermis	0.000815	0.001631	0.002446	0.000815	0	0.000815	0.000815
Hair Cells	0.500795	0.718869	0.594046	0.086643	0	0.426138	0.799948
Melanocytes	0.010423	0	0	0	0	0.005212	0
Mesenchyme 1	0	0	0	0.018004	0	0	0
Mesenchyme 2	0.002598	0.0016	0.001384	0.008894	0.000272	0.000952	0.004128
Neural Crest	0.001402	0.000542	0.001402	0.000542	0	0	0.001085
Neuroectoderm	0	0	0	0	0	0	0
Neurons	0.008645	0.014399	0.023415	0.004373	0	0.011119	0.005013
Otic	0.006376	0.014413	0.008165	0.004498	0.001048	0.019128	0.008996
PSC 1	0	0	0	0	0	0	0
PSC 2	0	0	0	0	0	0	0
Surface Ectoderm 2	0.003349	0	0.010046	0	0	0.005307	0
Unknown	0	0	0.005825	0.004616	0	0.015499	0.005825

## Sheet: Figure 1-figure supplment 1D
qPCR-5dpf	wild type	minar2fs139	minar2fs140
Relative expression levels	1	0.273642	0.351878
	1	0.497792	0.504861
	1	0.299491	0.156012
	1	0.325333	0.44295
	1	0.238571	0.235736
qPCR-8dpf	wild type	minar2fs139	minar2fs140
Relative expression levels	1	0.514507	0.245212
	1	0.506308	0.453793
	1	0.492	0.262176

## Sheet: Figure 1-figure supplement 1E
minar1a, qPCR-8dpf	wild type	minar2fs139	minar2fs140
Relative expression levels	1	1.53229	1.1123
	1	1.05237	1.3021
	1	0.862978	0.788729
minar1b, qPCR-8dpf	wild type	minar2fs139	minar2fs140
Relative expression levels	1	2.17794	0.58424
	1	0.416604	1.65689
	1	1.46879	1.13122

## Sheet: Figure 1-figure supplement 2A
5dpf				8dpf
Hair cells/LC--wild type	Hair cells/LC--minar2fs139	Hair cells/LC--minar2fs140		Hair cells/LC--wild type	Hair cells/LC--minar2fs139	Hair cells/LC--minar2fs140
29	24	26		35	34	35
27	27	28		23	34	30
27	22	30		32	36	32
28	23	27		33	34	31
32	20	24		33	38	35
28	22	30		34	31	34
22	23	23		29	33	30
25	25	27		32	32	34
23	25	25		34	37	32
25	23	21		29	33	32
23	27	22		37	30	31
25	26	23		38	33	32
22	20	23		33	30	29
20	24	22		32	34	36
21	25	27		24	32	34
21	26	24		31	32	37
23	25	21		35	32	24
29	23	22		35	30	36
26	26	24		26	29	35
18	26	26		31	34	38
23	20	29		32	34	37
20	22	24		36	33	32
27	25			36	33	34
20	20			35
20	23			36
23	24			40
23	25			25
23	20			34
23	24			39
25				31
28				27
23				30
20				26
20				37
				36
				33

## Sheet: Figure 1-figure supplement 2B
Standard length(mm)--wild type	Standard length(mm)--minar2fs139			Body weight(g)--wild type	Body weight(g)--minar2fs139
22	22			0.183	0.259
23	22			0.282	0.25
23	23			0.279	0.257
22	23			0.214	0.248
22	21			0.227	0.242
24	22			0.273	0.231
24	22			0.225	0.189
21	23			0.228	0.276
23	22			0.277	0.211
	22				0.21
	21				0.251

[truncated: 1 more sheets: Figure 1-figure supplement 2C]
