# Supplementary material for: Kiaa1024L/Minar2 is essential for hearing by regulating cholesterol distribution in hair bundles
Source: eLife. 2022 Nov 1;11:e80865. doi: 10.7554/eLife.80865 (PMC9714970; doi:10.7554/eLife.80865)
Supplement: Figure 2—source data 1. [file elife-80865-fig2-data1.xlsx]

## Sheet: Figure 2C
8dpf
Stereocilia Length (μm) wild type	Stereocilia Length (μm) minar2fs139	Stereocilia Length (μm) minar2fs140
5.254	6.188	4.948
4.137	6.129	4.238
5.996	7.172	4.472
3.547	8.314	7.374
5.4	7.074	7.031
5.309	6.864	5.356
6.255	6.778	3.822
5.875	5.896	5.494
6.496	6.925	5.309
4.332	6.913	6.37
3.611	4.64	3.914
5.669	8.314	4.409
4.992	7.485	6.236
3.979	7.365	5.166
4.303	6.774	7.155
4.946	9.089	6.635
2.931	6.101	6.727
3.811	8.394	6.195
2.811	5.392	5.344
2.856	5.276	5.982
3.914	4.612	5.072
3.623	5.621	6.091
7.052	8.745	6.273
4.617	7.005	6.133
3.828	7.143	6.505
8.818	7.96	6.672
6.006	5.604	7.53
6.118	6.016	5.253
3.411	3.798	7.052
3.583	3.933	5.727
5.03	6.605	3.544
3.976	8.147	5.257
7.199	8.035	7.462
5.353	8.962	6.518
4.37	7.041	6.439
5.216	8.595	6.963
6.939	6.449	8.353
5.126	6.114	7.676
5.834	4.547	6.223
3.642	4.152	7.314
3.98	6.222	4.434
3.922	7.372	6.679
8.667	6.416	5.114
5.601	10.019	4.841
4.954	9.581	7.086
7.513	6.486	5.547
4.327	6.255	5.114
6.657	9.009	5.377
4.955	7.46	5.915
3.64	6.66	5.051
3.798	5.012	4.599
4.4	5.509	6.181
6.605	6.908	6.721
5.872	10.611	5.968
5.918	7.75	6.555
3.411	7.934	6.721
6.657	8.349	6.975
5.721	8.963	4.562
4.121	7.974	3.571
7.422	7.821	4.653
4.676	6.522	5.552
7.798	5.521	4.152
4.43	6.211	6.735
4.779	8.93	5.344
4.346	7.793	6.146
5.783	6.993	5.377
5.451	7.014	4.447
5.673	7.138	5.505
3.653	7.374	4.801
6.045	7.228	4.132
4.739	6.621	4.357
6.031	6.715	5.233
5.62	8.384	6.133
5.666	9.143	5.827
6.886	9.135	5.743
5.051	7.359	5.262
4.443	7.374	6.482
5.929	6.503	4.472
2.672	6.035	3.782
4.748	5.131	4.382
4.447	5.975	4.174
5.929	8.295	5.166
5.842	7.656	6.354
4.987	8.113	7.555
7.6	7.11	5.673
8.571	6.286	6.873
8.848	4.409	5.872
6.695	6.593	3.877
6.197	7.342	3.508
4.594	6.08	5.216
3.41	5.668	4.152
3.98	6.886	4.575
8.625	8.246	7.914
7.416	7.02	7.57
10.827	9.893	6.236
4.606	5.172	6.81
6.518	9.691	7.793
6.715	8.246	6.913
3.777	7.623	7.722
3.79	6.626	8.335
5.885	5.942	6.031
5.859	6.647	8.525
6.284	7.637	7.298
7.422	8.045	7.134
5.865	5.628	7.666
6.424	6.304	6.634
5.894	5.269	6.492
6.202	5.738	5.621
3.628	5.18	4.842
11.744	4.194	3.363
5.115	7.793	5.056
5.915	6.774	7.114
6.393	7.713	6.427
5.439	6.774	7.417
6.861	7.628	8.282
4.859	7.016	6.189
6.595	8.32	7.195
7.777	5.62	5.702
5.762	6.805	5.944
4.911	5.051	6.836
5.034	7.4	5.872
4.332	4.851	6.337
7.214	6	6.784
5.62	5.294	9.143
5.302	5.532	7.325
7.232	5.421	6.873
5.62	7.065	6.411
5.353	4.346	5.344
5.521	5.115	5.159
3.8	5.317	5.746
3.709	6.201	4.996
4.37	5.831	4.636
5.857	4.885	7.561
7.023	5.597	6.384
4.606	5.196	6.92
4.949	5.563	5.776
7.023	6.324	7.895
6.778	5.276	7.706
6.16	4.766	6.078
4.458	5.067	7.14
5.563	5.639	5.296
2.771	5.597	5.666
4.499	6.581	5.974
4.702	6.283	8.755
3.208	6.672	7.861
4.523	5.646	6.995
2.869	7.217	6.757
3.558	8.23	8.271
5.088	8.145	7.48
2.544	5.123	6.091
5.072	6.078	4.825
4.667	5.676	6.427
7.462	5.657	7.804
4.886	7.048	8.1
6.612	7.536	7.471
6.67	4.961	8.756
5.123	6.489	6.547
4.102	8.246	5.528
4.748	7.92	5.892
6.183	5.857	8.571
5.252	5.334	5.114
4.953	7.066	7.11
6.045	7.632	7.345
5.899	7.348	7.126
9.454	6.486	6.599
6.555	5.381	8.079
7.385	5.001	7.313
5.688	9.97	4.337
7.234	7.689	6.852
5.801	6.774	5.532
3.731	4.528	4.954
4.424	6.695	5.253
4.664	6.695	10.102
5.289	8.994	6.371
6.6	10.009	6.286
5.026	8.462	6.544
6.944	6.201	7.84
5.673	8.045	7.427
6.631	6.496	5.713
5.968	7.384	4.996
5.016	4.978	3.909
4.841	5.975	5.166
4.227	6.679	8.169
4.629	8.43	6.913
5.187	6.993	6.071
4.468	6.79	5.951
4.885	7.114	6.605
4.202	6.291	6.746
3.523	6.283	5.673
4.859	5.727	7.007
4.88	5.668	5.072
5.051	6.909	5.317
6.944	6.127	8.318
6.331	6.354	7.754
8.05	7.558	7.502
7.416	7.502	6.161
6.284	7.648	5.754
6.622	7.306	7.366
5.505	6.717	5.46
5.74	7.525	5.974
5.184	6.222	6.502
6.147	5.289	8.241
5.463	6.902	7.115
10.918	6.211	5.46
5.994	6.727	5.506
4.234	8.017	4.658
4.992	7.467	6.045
6.695	7.944	6.313
7.53	5.975	5.159
4.491	6.387	3.128
4.018	5.878	5.348
5.532	5.114	4.987
5.249	8.323	6.595
5.419	7.725	4.708
9.029	7.934	8.045
7.757	6.808	6.801
10.696	6.427	4.594
8.05	7.066	5.159
5.341	5.245	4.43
6.286	9.153	3.909
4.561	5.28	5.344
8.467	7.934	5.537
6.518	7.725	6.606
6	6.125	6.57
5.073	5.407	7.088
7.425	10.102	4.477
5.026	8.871	5.15
4.208	7.985	5.754
4.842	7.739	4.793
5.39	7.236	4.788
5.151
4.543
8.24
6.43
6.702
8.313
5.365
5.212
5.74
6.817
6.482
5.173
9.603
7.417
6.906
7.21
7.374
6.222
5.843
5.562
4.525
6.098
7.556
6.035
7.788
3.811
7.623
6.384
6.122
5.148
4.505
4.955
6.873
4.851
7.181
9.333
7.46
4.075
6.06
4.332
3.782
4.022
7.191
7.427
3.87
4.075
6.427
7.942
4.284
4.667
4.487
6.384
6.489
7.974
6.133
9.755
8.547
7.416
6.886
7.821
4.4
3.575
5.577
7.14
6.08
8.304
5.702
6.223
8.497
2.704
4.572
7.151
7.333
6.133
4.243
5.252
6.08
5.805
4.756
4.793
5.029
5.126
5.03
7.331
7.011
6.749
5.929
4.996
5.494
5.068
5.586
5.114
5.029
7.871
6.777
6.541
6.265
7.4
4.203
6.101
3.709
4.654
7.655
5.623
6.062
7.895
6.793
5.9
4.971
4.157
4.543
5.799
4.996
7.931
5.623
5.776
5.798
8.994
8.016
5.482
5.233
4.825
6.469
5.463
5.056
5.805
5.681
4.081
5.246
3.944

## Sheet: Figure 2D
6mpf
Stereocilia length (μm) --wild type	Stereocilia length (μm)--minar2fs139
5.60916	6.52117
4.17657	6.9664
3.28348	6.80676
2.40849	5.56121
3.69144	7.00706
3.92979	6.60366
3.13363	6.99264
3.80033	6.38453
2.69339	5.56121
3.49325	4.94459
4.90796	6.21347
5.76426	6.45631
5.36709	6.39124
5.80931	5.4461
5.40429	5.93699
4.62192	5.9524
3.94494	6.89709
6.55796	6.27042
6.0006	6.12823
4.92432	6.5153
3.05311	6.08889
2.68604	7.21467
4.12718	5.31952
3.41794	6.51215
5.23979	5.81967
3.49895	6.08341
5.4461	5.42027
3.72052	5.25023
5.28544	4.28453
5.19277	3.76141
4.56532	3.84743
4.36844	5.97252
4.49895	3.9703
3.60916	4.97282
3.60591	4.94014
3.25901	4.32177
3.12436	4.83363
4.00405	3.39745
5.38569	2.97345
3.54189	4.10781
3.56121	7.34489
4.16592	4.86664
3.84218	4.67372
4.00901	6.5306
3.80901	5.72583
3.29883	6.08341
4.20901	5.12763
3.5444	5.30813
2.63318	5.4461
4.12346	5.4595
2.80285	6.36246
2.82868	4.56532
5.14715	5.00045
3.5444	6.49655
3.40931	6.55206
2.78123	6.85375
4.05011	5.51785
3.40931	6.18363
3.05311	6.17477
3.003	5.09625
2.34113	6.5306
3.22808	6.28649
3.05311	7.03273
2.69339	7.66622
3.16262	9.0467
3.00961	6.5306
2.68604	5.37192
3.25608	6.81248
2.97613	6.97267
3.62256	7.07171
3.82477	6.93799
2.82868	5.40429
2.28258	5.09625
4.44119	6.18363
3.00961	5.40429
3.05311	5.60916
2.21126	3.92979
2.41066	4.42252
2.91239	5.40429
2.33468	3.77733

## Sheet: Figure 2E
Inner ear--Distribution of LAMP1	Normal	Large aggregates
wild type	145	39
minar2fs139	102	134

## Sheet: Figure 2F
Lateral line--Distribution of LAMP1	Normal	Large aggregates
wild type	31	13
minar2fs139	28	62

## Sheet: Figure 2-figure supplement 1D
5 dpf
	normal	disorganized
wild type	38	10
minar2fs139	14	23
minar2fs140	26	24
8 dpf
	normal	disorganized
wild type	34	6
minar2fs139	12	29
minar2fs140	8	20
