# Supplementary material for: Kiaa1024L/Minar2 is essential for hearing by regulating cholesterol distribution in hair bundles
Source: eLife. 2022 Nov 1;11:e80865. doi: 10.7554/eLife.80865 (PMC9714970; doi:10.7554/eLife.80865)
Supplement: Figure 3—source data 1. [file elife-80865-fig3-data1.xlsx]

## Sheet: Figure 3B
HEK293 cell							Cos-7 cell
Total Filipin Fluor. (au)			Recruited Filipin Intensity (au)				Total Filipin Fluor. (au)			Recruited Filipin Intensity (au)
GFP	GFP-MINAR2		GFP	GFP-MINAR2			GFP	GFP-MINAR2		GFP	GFP-MINAR2
87.4652	123.461		3.85216	16.0652			126.084	71.9719		6.87172	13.19
80.4299	114.901		4.29426	33.784			159.235	97.8086		12.5761	11.427
84.3544	119.251		4.64352	17.3468			75.1156	142.961		13.231	11.6388
86.5976	114.931		7.20638	19.2252			120.745	152.768		13.6535	13.4035
115.863	115.37		7.56143	11.6405			73.7956	183.816		11.8333	20.801
84.9141	114.509		4.20255	27.0866			169.249	133.252		14.9301	15.023
89.2869	114.434		9.73772	18.0375			89.8301	114.547		13.3739	13.7201
107.501	119.483		8.05835	36.6642			104.537	119.778		17.0117	12.4681
96.0718	101.124		7.20341	17.973			85.6525	90.9451		13.8162	9.50335
79.3638	119.464		5.16629	27.6502			99.8186	62.144		12.182	6.5389
109.324	140.732		8.79439	28.7313			176.202	143.417		14.12	16.9274
115.119	71.4792		4.13856	11.2361			111.168	58.8143		7.02436	11.9872
113.365	91.7896		9.11679	21.3944			105.767	84.2173		7.86018	8.52423
126.11	102.459		15.0886	11.516			136.46	109.316		16.2667	9.27536
105.002	113.474		8.27634	16.6391			120.662	101.903		14.4176	9.43977
99.9693	106.202		9.12316	23.7799			85.2143	108.513		8.31028	10.6015
107.395	116.987		6.7737	24.9637			62.2931	93.3575		9.78519	17.2567
75.1989	84.8679		4.00345	13.7376			29.371	143.223		2.07152	53.6677
86.4199	106.579		7.43116	24.7041			98.5622	108.016		5.87815	27.0646
81.2849	115.263		4.66913	20.5228			82.4656	104.364		9.59825	19.6342
90.1904	69.1363		8.6566	14.7369			114.168	107.028		12.7714	19.5043
93.5744	126.275		5.76817	32.8435			98.2348	124.86		5.67382	9.39089
68.3135	146.371		2.87607	50.7296			103.264	70.6425		22.7514	13.1616
77.0722	140.138		3.27744	30.7604			187.729	44.9305		16.8431	16.561
73.4419	95.1837		3.13196	9.00337			55.3304	263.387		28.4067	38.4534
64.7021	108.481		2.94532	18.5377			23.6168	380.859		5.77629	35.524
41.1887	129.407		2.04019	16.9879			3.19567	254.708		0.723588	35.5671
53.5361	115.745		1.91575	13.0479			115.843	229.769		20.4085	50.1862
60.8644	102.151		2.52072	10.1296				250.018			35.1893
61.0569	134.992		2.54463	19.958				105.791			31.9979
83.5356	130.212		1.78933	18.0614				258.199			36.2223
90.0185	144.881		4.78133	29.9795				84.4339			22.3835
72.1571	148.716		3.93664	51.563				109.287			49.1886
86.6373	150.084		2.75802	33.4684				120.194			47.4198
72.2424	101.48		3.81483	16.6213				281.534			21.9984
90.0292	111.943		3.03463	16.5434
72.8431	87.9131		2.97085	7.87971
64.2421	104.555		2.67441	12.7424
61.3143	115.131		1.05985	15.1582
65.8055	123.457		2.86345	15.7343
53.5606	154.582		1.75789	22.8534
78.3887	106.452		3.00997	16.2518
17.753	72.8002		5.77975	21.2827
53.5562	118.421		13.5208	47.0188
99.6645	94.5896		12.1989	34.0238
58.8014	162.805		10.2791	36.361
67.8581	46.3199		6.66832	23.5726
40.0747	45.8208		9.10866	17.8688
47.2847	96.8539		8.21707	33.1212
70.0023	65.7153		5.17155	45.2723
69.4436	92.3246		17.7931	32.7878
	65.1889			20.2163
	96.6268			32.7606
	98.36			19.6612
	137.478			35.7775
	47.4643			17.8127
	37.0415			31.1629
	48.5178			21.5003
