# Supplementary material for: Kiaa1024L/Minar2 is essential for hearing by regulating cholesterol distribution in hair bundles
Source: eLife. 2022 Nov 1;11:e80865. doi: 10.7554/eLife.80865 (PMC9714970; doi:10.7554/eLife.80865)
Supplement: Figure 5—source data 1. [file elife-80865-fig5-data1.xlsx]

## Sheet: Figure 5A
5dpf-L3-D4H Intesnity
EM--wild type	2HPβCD--wild type	EM--minar2fs139	2HPβCD--minar2fs139
74.3626	12.493	34.5866	2.43012
157.576	11.5134	8.63556	9.3386
45.3129	5.40971	26.9368	4.18898
144.751	13.2424	30.1992	8.30532
59.9467	4.58548	55.2946	9.03088
49.7171	28.6578	49.9944	37.1638
89.3964	11.8114	68.995	13.391
54.0817	3.30071	7.41891	14.6554
163.339	45.0154	14.3206	5.50104
74.247	2.72668	78.8466	15.0866
187.269	17.7293	46.5087	28.6779
80.281	3.8852	88.1983	8.26628
74.8422	36.2102	31.7945	6.09075
61.5938	8.75302	54.7989	10.9522
145.423	0.007346	69.8063	6.47193
65.6672	46.1271	11.315	13.9421
153.876	32.3176	53.3228	11.9155
101.771	10.3616	5.23148	25.8959
90.5544	3.39348	73.7967	8.79771
125.991	0.006748	6.48839	3.3747
68.7341	14.4601	142.225	19.3621
84.6504	14.2842	64.9632	44.6157
189.775	0.809719	26.1983	43.483
114.685	34.4513	25.0195	24.7566
113.618	8.68373	96.5011	20.4456
52.5801	22.6474	121.88	31.2015
65.8294	25.8718	102.063	29.8301
106.015	28.0592	91.1005	28.6578
104.93	16.1593	8.76745	11.8114
79.3	11.8211	84.4808	3.30071
109.838	0.029081	92.6932	45.0154
151.973	0.695229	95.5075	2.72668
59.4049	1.24926	27.6446	17.7293
102.178	5.25172	35.8145	3.8852
212.08	4.22126	21.7484	36.2102
41.0308	31.7057	11.0027	8.75302
55.0169	11.0822	26.8248	0.00734619
61.9072	62.1554	16.0986	46.1271
96.9886	8.67506	53.0337	32.3176
129.464	47.7301	35.9556	10.3616
133.318	29.7101	54.5773	3.39348
143.279		26.6888	0.00674842
21.5184		4.6761	14.4601
64.9964		97.3042	14.2842
136.888		107.727	0.809719
		143.735	34.4513
		52.3224	8.68373
		73.6865	22.6474
		109.812	25.8718
		87.6343	28.0592
		29.0155	16.1593
		21.885

## Sheet: Figure 5B
5dpf-L3-AM1-43 Intesnity
EM--wild type	2HPβCD--wild type	EM--minar2fs139	2HPβCD--minar2fs139
106.41	78.9915	94.4883	36.2668
79.3392	19.133	36.8001	47.1693
79.3356	52.67	42.3155	41.4527
119.784	97.6224	64.0078	84.8054
101.005	56.0361	69.1903	68.6373
108.034	45.5558	76.1217	52.3334
95.0179	85.5005	95.4089	29.888
94.3146	42.356	99.69	43.8219
105.337	47.1157	76.4766	53.4689
131.422	52.0209	83.968	46.4814
100.964	64.8116	44.5307	23.0287
85.111	44.713	62.451	44.1741
93.9262	16.4773	57.3415	0.703171
112.594	35.0473	104.897	26.0774
109.649	24.1423	112.587	23.5861
79.0987	25.3445	103.428	12.0146
115.822	24.8035	117.289	12.551
94.6593	26.992	71.0414	26.0966
100.152	17.9359	80.5905	19.6142
89.9535	23.6909	40.7871	28.6875
98.0715	23.5905	108.425	5.47051
107.057	23.9636	75.8704	9.75448
83.033	20.1851	41.8497	7.43295
124.707	20.4037	41.3886	1.29247
125.779	30.9155	67.7852	25.0987
77.6345	27.0827	51.0862	47.7602
105.725	35.5261	66.5162	14.1667
94.3074	39.971	27.3091	6.81106
94.7953	37.6815	24.8158	35.3626
77.742	44.2269	40.3138	44.9265
90.1093	44.6114	28.618	35.8586
77.2294	47.797	28.6679	16.0184
127.351	43.6527	41.7844	12.4206
114.531	25.6373	73.8395	27.0239
108.17	41.8941	45.8629	21.6065
91.2979	3.48841	37.8279	21.5271
120.537	9.44375	12.0305	38.2004
84.4408	10.9161	24.2689	18.7055
122.328	19.4365	37.6302	24.7478
87.5633	31.8015	22.5036	27.1772
113.797	18.752	73.284	13.1623
99.597	12.0992	43.3249	9.24241
91.5051	15.129	18.0604	15.4554
72.4178	23.8667	66.519	36.511
115.796	8.3596	48.7413	30.8281
94.2263	1.49281	31.2397	7.60057
119.369		25.7277	35.4131
92.6775		48.0216	30.1582
86.2777		55.5508	12.6585
			20.2449
			23.7286

## Sheet: Figure 5C
5dpf-L3-D4H Intesnity
DMSO--WT	U18666A--WT	DMSO--minar2fs139	U18666A--minar2fs139
61.6892	18.3211	11.0113	11.8211
73.429	69.7173	33.3503	0.0290808
49.8125	65.0464	48.6496	0.695229
125.805	63.7293	152.983	1.24926
165.584	51.5271	170.435	5.25172
154.118	28.7445	0.006381	4.22126
91.6327	43.5185	174.232	28.6578
19.9345	19.5104	100.927	11.8114
161.324	12.8132	108.479	3.30071
88.8754	36.0378	72.6706	45.0154
98.2629	35.636	51.2216	2.72668
86.6781	105.712	94.2787	17.7293
138.701	35.1078	76.0825	3.8852
87.6751	61.8453	19.4986	36.2102
101.846	2.33006	30.8627	8.75302
69.9583	55.9061	81.5512	0.00734619
63.3912	95.0604	57.3913	46.1271
80.3866	78.1964	74.1	32.3176
67.7292	38.7595	52.6806	10.3616
84.0766	2.7383	35.7606	3.39348
109.027	38.0991	44.151	0.00674842
132.29	53.5198	48.6389	14.4601
28.5515	34.1214	6.29097	14.2842
136.076	64.9061	30.5785	0.809719
165.375	69.6694	41.6716	34.4513
140.156	76.558	32.0646	8.68373
163.967	86.7446	28.0726	22.6474
137.981	57.6474	15.2208	25.8718
76.3952	71.772	49.8823	28.0592
96.8034	41.4428	35.6882	16.1593
62.3551	42.5852	52.241	11.0673
69.8289		49.1481	19.3978
120.852		179.014	4.49992
60.6044		67.9822
166.338		39.0896
15.4952		48.5832
72.4696		31.1356
70.7438		28.5579
138.6		2.94064
165.181		2.24034
		46.4328
		19.3914

## Sheet: Figure 5D
5dpf-L3-AM1-43 Intesnity
DMSO--WT	U18666A--WT	DMSO--minar2fs139	U18666A--minar2fs139
77.6323	4.47003	96.0742	2.57043
104.658	45.6878	77.1739	2.16069
91.6915	9.40356	87.5136	6.80149
114.182	40.3481	59.0472	23.5381
113.199	5.9128	106.326	12.741
91.8084	23.8114	107.974	13.9061
93.3216	4.17739	88.637	2.76286
102.635	64.2163	87.4961	11.7625
96.1551	22.2552	81.4833	2.98422
108.34	23.6024	87.3832	5.33599
114.067	25.191	50.2793	1.04844
91.6093	62.0483	97.2076	35.1453
123.666	41.0013	94.4883	47.8873
77.0343	96.5558	36.8001	25.3882
106.41	79.3768	42.3155	37.6244
79.3392	52.9512	64.0078	25.1331
79.3356	81.8504	69.1903	90.2438
119.784	65.6808	76.1217	38.9783
101.005	67.6855	95.4089	43.394
108.034	44.96	99.69	5.85041
95.0179	69.274	76.4766	44.7254
94.3146	68.6494	83.968	21.1231
105.337	93.0346	44.5307	35.5214
131.422	68.1516	62.451	43.072
100.964	46.4083	57.3415	0.946615
85.111	24.4753	104.897	9.98462
93.9262	21.6978	41.8497	13.1293
107.057	37.9359	41.3886	3.17042
83.033	18.501	67.7852	5.16639
124.707	31.0432	51.0862	9.2592
125.779	38.1252	66.5162	2.25064
77.6345	30.4443	27.3091	20.1425
105.725	6.18801	24.8158	5.21848
94.3074	18.9324	40.3138	9.95485
94.7953	28.469	28.618	9.88819
77.742	28.0258	28.6679	4.76864
90.1093	21.5696	41.7844	10.375
77.2294	24.6995	73.8395	5.19546
127.351	27.9795	45.8629	6.96657
114.531	18.9376	102.263	7.4377
89.0674	15.652	68.5363	6.67159
112.763	5.93933	70.611	7.02063
96.9998	6.40692	42.673	9.35813
111.756	8.20407	74.8827	5.91142
107.705	8.17892	133.145	8.84871
88.2379	33.7447	71.406	7.53819
102.07	42.8878	73.5398
72.9727	31.2618	85.5928
104.502	2.09012	89.202
92.8809	27.6752	62.3079
108.761		64.6039
106.079		91.779
106.204

## Sheet: Figure 5-figure supplement 1A
C-start response rate
EM--wild type	2HPβCD--wild type	EM--minar2fs139	2HPβCD--minar2fs139
80	0	30	0
70	10	10	10
70	0	10	0
80	40	10	40
70	10	10	10
60	0	0	30
100	0	0	10
30	0	0	20
60	0	0	0
90	0	0	20
60	90	30	0
60	0	60	20
60	10	0	0
50	0	40	0
70	0	50	10
60	0	0	0
30	0	20	20
50	10	20	0
60	40	20	30
60	20	10	0
60	0	20	30
20	0	0	50
30	0	20	10
30	0	40	10
40	30	0	0
80	20	0	0
80	0	30	0
30	0	60	0
50	0	30	0
40	20	50	0
90	20	40	10
40	0	40	50
50	0	20	0
10	10	50	0
50	50	40	0
100	0	30	50
50	50	50	0
40	0	10	0
50	0	20	50
80	40	50	0
50	0	10	20
20	0	20	0
30	0	30	0
100	0	60	0
40	10	20	0
60	0	50	0
70	10	30	30
40	0	70	0

## Sheet: Figure 5-figure supplement 1B
5dpf-L3-hair cell number							5dpf-L3-hair cell number
EM--wild type	2HPβCD--wild type	EM--minar2fs139	2HPβCD--minar2fs139				DMSO--WT	U18666A--WT	DMSO--minar2fs139	U18666A--minar2fs139
10	7	9	10				10	4	8	6
9	10	8	8				9	7	8	4
10	7	9	8				10	9	7	6
11	8	9	9				9	6	9	4
10	10	12	7				11	8	9	1
10	9	7	8				9	6	9	6
9	8	8	7				9	7	9	2
9	8	8	10				10	7	8	5
10	9	10	9				13	6	7	6
8	7	11	10				9	7	7	0
10	7	8	9				8	8	8	8
11	7	7	12				9	9	8	5							#NAME?
7	9	5	10				7	7	8	0
8	9	10	10				9	8	8	7
10	9	7	8				9	8	7	10
9	8	9	9				8	7	8	6
7	7	12	9				8	7	8	6
12	9	10	8				8	8	8	6
13	7	10	8				9	7	10	4
11	8	10	8				9	6	9	5
14	8	9	7				12	0	9	7
10	8	9	6				8	0	10	8				hair cell numbers+A1
10	10	8	7				9	6	10	2
12	8	10	7				12	7	8	6
11	8	8	10				8	9	9	6
10	9	6	8				7		8	5
8	10	7	7				11		10	5
	7		7				10		6
	8		6				7
	7		7				9
	10		7
	10
