# Supplementary material for: Kiaa1024L/Minar2 is essential for hearing by regulating cholesterol distribution in hair bundles
Source: eLife. 2022 Nov 1;11:e80865. doi: 10.7554/eLife.80865 (PMC9714970; doi:10.7554/eLife.80865)
Supplement: Figure 6—source data 1. [file elife-80865-fig6-data1.xlsx]

## Sheet: Figure 6A
5dpf-L3-D4H Intesnity
WT-DMSO	WT-EFA	minar2fs139-DMSO	minar2fs139-EFA
61.6892	73.8024	11.0113	90.3744
73.429	81.4457	33.3503	40.3298
49.8125	64.4027	48.6496	45.4615
125.805	66.8118	152.983	129.128
165.584	341.547	170.435	87.0014
154.118	334.736	0.00638129	38.5948
91.6327	148.694	174.232	26.7857
19.9345	117.845	100.927	188.918
161.324	39.7722	108.479	167.761
88.8754	77.5672	72.6706	70.1943
98.2629	85.2175	51.2216	25.4276
86.6781	115.317	94.2787	55.298
138.701	63.1412	76.0825	153.175
87.6751	52.713	19.4986	128.401
101.846	49.9845	30.8627	42.4064
69.9583	166.541	81.5512	64.0886
63.3912	188.105	57.3913	66.0509
80.3866	171.545	74.1	55.2996
67.7292	69.3419	52.6806	61.6548
84.0766	75.5359	35.7606	90.0575
109.027	72.9604	44.151	86.0946
132.29	48.8794	48.6389	30.7172
28.5515	43.8346	6.29097	158.02
136.076	65.8237	30.5785	179.191
165.375	49.8897	41.6716	131.691
140.156	153.629	32.0646	31.8771
163.967	129.586	28.0726	142.686
137.981	68.0424	15.2208	155.642
76.3952	113.508	49.8823	50.4489
96.8034	77.9677	35.6882	27.92
62.3551	22.7211	52.241	178.552
69.8289	223.567	49.1481	178.655
120.852	214.624	179.014	31.1795
60.6044	176.126	67.9822	104.645
166.338	188.542	39.0896	51.1845
15.4952	73.0297	48.5832	163.266
72.4696	54.9213	31.1356	25.571
70.7438	220.627	28.5579	21.8025
138.6	73.2071	2.94064	101.72
165.181	72.5721	2.24034	49.6103
	29.7101	46.4328	108.617
		19.3914

## Sheet: Figure 6B
5dpf-L3-AM1-43 Intesnity
WT-DMSO	WT-EFA	minar2fs139-DMSO	minar2fs139-EFA
67.3598	112.439	83.8804	97.9591
87.1732	95.2015	69.5398	84.7957
108.948	80.6501	74.3106	102.927
105.103	78.5366	74.7973	90.7825
99.7081	77.5997	85.2792	93.8053
112.66	112.062	52.8728	98.6758
112.889	96.2058	59.8671	63.4029
101.804	106.618	77.9164	102.742
104.354	96.307	83.1945	81.6952
107.823	96.9476	70.1249	99.488
102.964	101.159	52.7744	87.2727
94.6301	84.0176	75.4398	99.4312
95.735	106.337	45.8968	95.3869
114.702	87.0223	45.7838	100.432
97.4792	139.028	58.9222	80.819
91.1354	99.3511	58.6812	81.1061
90.1579	143.59	81.9613	72.3312
102.36	110.856	86.4073	78.8794
103.014	112.835	36.986	51.3674
116.042	110.367	64.7128	97.2518
107.282	135.779	83.6542	103.276
99.1448	128.405	33.1209	116.919
80.877	119.861	29.3089	102.378
80.7433	143.245	53.682	106.816
105.154	131.628	41.074	109.22
101.867	126.988	67.7894	103.294
118.949	55.9511	77.0403	110.749
92.6057	103.994	37.6496	122.637
81.1252	86.1827	67.3874	122.419
105.347	135.382	59.4243	124.48
110.862	116.825	61.9657
	65.869	39.6373
	133.287	48.6255
	131.456
	92.0108
	111.653
	106.662

## Sheet: Figure 6C
8dpf--Distribution of cholesterol	Normal	Abnormal
WT--DMSO	35	7
WT--EFA	35	3
minar2fs139-DMSO	23	19
minar2fs139-EFA	30	4

## Sheet: Figure 6D
C-start response rate %
WT-DMSO	WT-EFA	minar2fs139-DMSO	minar2fs139-EFA
70	30	20	20
50	30	70	70
70	20	40	10
50	20	40	50
60	60	40	60
40	70	30	50
70	70	40	50
50	30	40	80
50	50	10	50
30	30	10	10
60	40	90	50
20	40	40	10
10	100	20	60
70	20	0	30
40	90	10	80
40	20	40	60
40	40	20	70
80	50	20	50
50	40	50	80
80	40	50	50
40	40	0	70
30	60	20	50
60	70	20	40
80	40	20	10
10	40	0	40
40	60	10	70
70	60	10	40
60	40	20	40
60	90	30	50
40	90	10	40
30	20	20	20
40	50	0	10
30	70	50	50
80	50	70	70
50	60	40	20
60	50	20	60
70	70	40	100
50	50	40	10
20	50	10	60
10	10	0	30
30	60	60	10
50	40	20	20
30	50	20	50
10	80	40	50
90	50	0	50
60	50	50	0
60	70	50	30
30	20	0	20

## Sheet: Figure 6-figure supplement 1A
AM1-43 Intesnity
WT DMSO	WT Voriconazole	minar2 fs139 DMSO	minar2 fs139 Voriconazole
67.3598	92.1416	83.8804	86.207
87.1732	98.1837	69.5398	58.7611
108.948	80.7085	74.3106	99.8453
105.103	101.794	74.7973	87.5567
99.7081	84.9492	85.2792	60.9498
112.66	113.819	52.8728	84.2457
112.889	119.582	59.8671	82.7959
101.804	90.2319	77.9164	97.4135
104.354	74.9336	83.1945	94.9658
107.823	94.7303	70.1249	55.4741
102.964	96.5892	52.7744	81.1696
94.6301	100.118	75.4398	71.5174
95.735	70.2471	45.8968	90.2331
114.702	91.0189	45.7838	101.784
97.4792	61.5594	58.9222	111.324
91.1354	86.549	58.6812	52.4938
90.1579	74.9986	81.9613	85.3418
102.36	96.7509	86.4073	47.5829
103.014	65.6912	36.986	78.4996
116.042	112.258	64.7128	68.063
107.282	84.6047	83.6542	70.3338
99.1448	68.1742	33.1209	65.9399
80.877	90.0094	29.3089	85.4228
80.7433	108.634	53.682	61.6194
105.154	104.434	41.074	63.6912
101.867	69.2894	67.7894	66.7173
118.949	71.4571	77.0403	62.9458
92.6057	70.1615	37.6496	74.9887
81.1252	65.9106	67.3874	69.8379
105.347	60.9075	59.4243	57.6622
110.862	55.6872	61.9657	78.1847
	53.3786	39.6373	77.7226
	100.904	48.6255	68.0268
	88.0409		62.495
	96.7214
	89.9981
	75.2901
	93.675
	58.4853
	80.5885
	84.1457
	99.0139
	48.5192

## Sheet: Figure 6-figure supplement 1B
Distribution of cholesterol
	Normal	Abnormal
WT DMSO	35	7
WT Voriconazole	20	7
minar2 fs139 DMSO	23	19
minar2 fs139 Voriconazole	35	4
