# Supplementary material for: Kiaa1024L/Minar2 is essential for hearing by regulating cholesterol distribution in hair bundles
Source: eLife journal article supplement (doi:10.7554/elife.80865), 2022-11-01
Supplement: supp [file Figure 4-source data 1.xlsx]

## Sheet: Figure 4D
5dpf			8dpf
D4H Intesnity--wild type	D4H Intesnity--minar2fs139		D4H Intesnity--wild type	D4H Intesnity--minar2fs139
86.857	69.8121		125.87	1.0835
140.291	34.253		122.141	11.2507
50.8611	30.2038		110.64	2.89421
240.198	43.2507		44.7882	13.7047
56.3285	20.3257		96.5617	8.06931
75.911	50.7843		165.143	49.4416
89.3872	37.91		46.8095	25.0594
60.294	30.8189		86.7416	45.4254
31.6144	19.2046		71.166	88.9661
152.492	64.7634		60.1149	56.4728
93.1692	119.063		170.025	45.915
122.597	181.156		246.759	18.3077
64.2249	65.8059		110.69	43.1262
43.5018	56.4078		35.7379	139.59
60.935	22.4521		73.9392	76.1073
121.659	76.1029		156.452	47.2617
103.258	41.2463		109.49	158.12
142.943	46.7786		75.6784	75.2368
107.792	42.5632		89.6522	53.9505
148.602	95.8072		92.5018	67.727
107.085	48.6141		58.325	128.554
60.6963	97.2544		85.7181	138.223
43.7967	64.3626		58.8567	55.4093
163.381	19.9291		48.5034	14.364
116.599	27.3753		49.6945	19.7063
53.6492	165.529		65.2856	24.6031
134.186	58.9953		41.5191	28.2956
83.2023	21.1391		221.853	24.0619
36.9734	7.83442		88.4112	52.6059
72.5703	54.4402		79.9213	63.1173
150.717	28.4825		170.094	119.895
96.9465	24.8715		83.4416	141.572
207.263	23.7166		93.0849	30.5806
126.956	106.606		116.421	65.1026
88.6039	134.665		80.427	59.1589
186.843	21.0825		216.884	45.3639
59.6495	35.9556		96.2062
41.4839	54.5773		51.1054
132.469	26.6888		103.345
66.3363	4.6761
110.819	97.3042
73.5377	107.727
69.4281	143.735
52.1746	52.3224
80.1517	73.6865
82.2022	109.812
41.5564	87.6343
182.061	29.0155
185.747	21.885

## Sheet: Figure 4E
5dpf				8dpf Distribution of cholesterol	Normal	Abnormal
D4H Intesnity--wild type	D4H Intesnity--minar2fs139			wild type	35	7
74.3626	34.5866			minar2fs139	23	19
157.576	8.63556
45.3129	26.9368
144.751	30.1992
59.9467	55.2946
49.7171	49.9944
89.3964	68.995
54.0817	7.41891
163.339	14.3206
74.247	78.8466
187.269	46.5087
80.281	88.1983
74.8422	31.7945
61.5938	54.7989
145.423	69.8063
65.6672	90.5198
153.876	53.3228
101.771	41.8518
90.5544	73.7967
125.991	51.9071
68.7341	142.225
84.6504	64.9632
189.775	26.1983
114.685	25.0195
113.618	96.5011
52.5801	121.88
65.8294	102.063
106.015	91.1005
104.93	8.76745
79.3	84.4808
109.838	92.6932
151.973	95.5075
59.4049	27.6446
102.178
212.08
41.0308
55.0169
61.9072
96.9886
129.464

## Sheet: Figure 4F
qPCR	5 dpf hmgcra			5 dpf hmgcs1			5 dpf abcg1			5 dpf mylipa
	wild type	minar2fs139		wild type	minar2fs139		wild type	minar2fs139		wild type	minar2fs139
Relative expression levels	1	2.03834		1	1.34105		1	0.760489		1	0.754049
	1	2.81011		1	1.94385		1	1.43123		1	1.05466
	1	2.47193		1	2.11515		1	1.29377		1	2.47215
	1	2.93289		1	1.29108		1	0.634468		1	0.753398

## Sheet: Figure 4-figure supplement 1B
	stereocilium/basolateral ratio					fluorescence intensity (arbitrary unit)
	PM-GFP	D4H-mCherry				stereocilia_PM-GFP	stereocilia_D4H	basolateral_PM-GFP	basolateral_D4H
	0.68623	9.02214				152.873	394.661	222.772	43.7436
	0.96241	8.8057				130.536	162.695	135.634	18.4761
	0.48419	1.57921				112.071	54.1853	231.459	34.3118
	0.77746	4.55795				172.801	294.201	222.263	64.5468
	0.86008	3.78352				158.077	76.9434	183.792	20.3365
	0.73067	8.8948				155.542	164.408	212.875	18.4836
	0.5116	3.36855				116.108	96.5336	226.951	28.6573
	0.50791	1.30337				92.2351	41.1344	181.596	31.56
	0.83366	2.20685				175.468	82.7182	210.477	37.4825
	0.88201	1.60385				223.885	70.6284	253.835	44.0369
	1.01389	2.94016				87.0574	87.9124	85.8649	29.9005
	0.71746	1.5068				149.333	58.0679	208.142	38.5374
	0.62958	3.02427				188.34	126.919	299.152	41.9671
	1.12995	8.39278				193.284	118.134	171.056	14.0757
	0.635944	6.31342				113.655	131.226	178.718	20.7852
	0.789201	4.49293				346.34	94.2126	438.849	20.9691
	0.609199	13.102				182.38	119.095	299.376	9.08979
	0.594107	5.86022				202.287	91.1088	340.489	15.547
	1.07109	4.05706				391.069	58.8177	365.114	14.4976
	0.40388	16.4533				179.211	241.243	443.723	14.6623
	0.594545	7.37294				224.533	98.8255	377.655	13.4038
	0.665367	5.44831				217.923	90.7381	327.523	16.6544
	0.847987	6.47195				433.904	168.43	511.687	26.0246

## Sheet: Figure 4-figure supplement 1C
Western Blot	wild type	minar2fs139
D4H-mCherry/actin	1	0.990779
	1	1.0035
	1	0.986877
