# Supplementary material for: Kiaa1024L/Minar2 is essential for hearing by regulating cholesterol distribution in hair bundles
Source: eLife journal article supplement (doi:10.7554/elife.80865), 2022-11-01
Supplement: supp [file Figure 7-source data 1.xlsx]

## Sheet: Figure 7B
Total Filipin Fluor. (au)				Recruited Filipin Intensity (au)
GFP	MINAR21-190	MINAR2YW-A		GFP	MINAR21-190	MINAR2YW-A
78.3887	72.8002	118.143		3.00997	21.2827	17.726
17.753	118.421	82.6815		5.77975	47.0188	12.7035
53.5562	94.5896	89.3954		13.5208	34.0238	10.6714
99.6645	162.805	107.407		12.1989	36.361	15.6439
58.8014	46.3199	137.899		10.2791	23.5726	12.1115
67.8581	45.8208	70.6493		6.66832	17.8688	7.19067
40.0747	96.8539	85.2308		9.10866	33.1212	8.18995
47.2847	65.7153	59.0384		8.21708	45.2723	16.1241
70.0023	92.3246	116.19		5.17155	32.7878	12.2689
69.4436	65.1889	89.1813		17.7931	20.2163	9.17242
84.635	96.6268	109.865		9.55468	32.7606	12.9855
73.6051	98.36	72.2399		5.32119	19.6612	9.89869
105.242	137.478	106.333		4.8768	35.7774	19.6862
93.1621	47.4643	102.137		9.25821	17.8127	13.1672
111.556	37.0415	125.4		8.22973	31.1629	20.334
108.788	48.5178	100.203		5.09533	21.5002	21.4506
133.307	69.225	118.705		8.51747	23.4564	14.6402
57.6804	158.559	77.6819		5.69153	34.8939	8.88408
40.2792	96.1226	65.2709		4.96682	17.6514	8.71154
65.1399	95.1634	120.297		6.57975	18.9582	26.9051
59.6733	130.224	116.99		5.29182	27.0313	9.53513
73.1627	95.8023	86.8363		3.22399	22.6886	7.89973
83.3875	132.563	76.591		10.3535	21.4768	12.993
100.419	80.9724	98.6598		14.2143	31.9173	6.05492
74.4382	116.473	73.2454		10.0114	17.2625	12.0673
25.1536	89.616	133.309		1.79137	14.895	12.9241
40.3882	139.134	102.878		4.97721	22.7385	11.8352
34.8086	171.011	47.8501		2.81928	35.5939	4.34166
109.182	122.695	70.7209		7.83779	17.6743	11.9901
20.4122	149.299	29.902		7.19144	28.5923	9.18974
28.1036	75.5672	69.1055		4.71873	11.7353	15.3056
63.0064	138.914	46.5719		2.76891	27.2748	10.8546
49.4935	143.103	122.06		3.25543	25.4219	12.6164
54.3932	144.806	78.9533		8.8675	32.2223	15.0076
56.4623	125.777	104.866		6.59162	15.2072	15.2314
26.2496	91.1973	104.496		3.27883	15.5951	25.399
17.8716	105.32	87.8789		2.84048	9.80527	15.085
5.03678	107.652	68.3147		1.6492	37.9753	19.7592
22.5376	120.91	66.4378		2.97725	12.4546	5.43566
56.7383	110.56	62.0488		5.50521	17.3455	12.1242
71.6794	104.727	65.7735		6.01878	15.7407	12.2922
90.0072	105.604	95.7194		4.7171	29.2439	25.8713
48.9641	115.598	74.8713		2.76404	19.2977	13.145
28.0849	126.075	61.1734		1.91295	19.6368	24.6715
	80.1504	120.986			20.4763	10.8811
	111.258	45.6198			16.3301	7.48161
		96.5119				16.1702
		102.852				22.5044
		132.268				23.3509
		67.2966				7.0898
		96.0585				18.5855
		26.4778				2.90938
		57.0701				7.25938
		98.2249				11.1684
		70.2838				12.8454
		74.9454				20.0257
		77.5287				33.3445
		63.7423				27.6665
		70.767				34.7593
		79.1633				20.6027
		83.4143				13.3383
		96.4741				30.6005

## Sheet: Figure 7C
Western Blot	MINAR21-190	MINAR2YW-A
MINAR2/GAPDH	1	1.00574
	1	1.01193
	1	0.99409
